# 1      **Targeting Neutrophils Extracellular Traps (NETs) reduces multiple organ** 2                                          **injury in a COVID-19 mouse model**

3  
4      **Flavio P. Veras**<sup>1,2,6\*</sup>, Giovanni F. Gomes<sup>1,2</sup>, Bruna M. S. Silva<sup>1,2</sup>, Cicero J. L. R.  
5      Almeida<sup>1,2</sup>, Camila Meirelles S. Silva<sup>1,2</sup>, Ayda H. Schneider<sup>1,2</sup>, Emily S. Corneo<sup>4</sup>,  
6      Caio S. Bonilha<sup>1,2</sup>, Sabrina S. Batah<sup>3</sup>, Ronaldo Martins<sup>5</sup>, Eurico Arruda<sup>5</sup>,  
7      Alexandre T. Fabro<sup>3</sup>, José C. Alves-Filho<sup>1,2</sup>, Thiago M. Cunha<sup>1,2</sup>, Fernando Q.  
8      Cunha<sup>1,2\*</sup>

9  
10    <sup>1</sup>Center of Research in Inflammatory Diseases, Ribeirão Preto Medical School,  
11    University of São Paulo, Ribeirão Preto, São Paulo, Brazil; <sup>2</sup>Department of  
12    Pharmacology, Ribeirão Preto Medical School, University of São Paulo, Ribeirão  
13    Preto, São Paulo, Brazil; <sup>3</sup>Department of Pathology and Legal Medicine, Ribeirão  
14    Preto Medical School, University of São Paulo, Ribeirão Preto, São Paulo, Brazil;  
15    <sup>4</sup>Laboratory of Experimental Pathophysiology, Graduate Program in Health  
16    Sciences, Health Sciences Unit, University of Southern Santa Catarina, Criciúma,  
17    Santa Catarina, Brazil; <sup>5</sup>Virology Research Center, Ribeirão Preto Medical  
18    School, University of São Paulo, Ribeirão Preto, São Paulo, <sup>6</sup>Brazil; Department  
19    of BioMolecular Sciences, School of Pharmaceutical Sciences of Ribeirão Preto,  
20    Universidade de São Paulo, Ribeirão Preto, SP, Brazil

21  
22    \*Correspondence should be addressed to:  
23    Fernando Q. Cunha; Center of Research in Inflammatory Diseases (CRID),  
24    Ribeirão Preto Medical School, University of São Paulo, Rua das Paineiras,

1 casa 3; 14049-900, Ribeirao Preto, SP, Brazil. Tel: +55 16 33153324; Email

2 address: [fdqcunha@fmrp.usp.br](mailto:fdqcunha@fmrp.usp.br);

3 Flavio P Veras; Center of Research in Inflammatory Diseases (CRID), Ribeirão

4 Preto Medical School, Universisty of São Paulo, Av. Bandeirantes; 14049-900,

5 Ribeirao Preto, SP, Brazil. Tel: +55 16 33154704; Email address:

6 [fprotasio@usp.br](mailto:fprotasio@usp.br)

7

8

9

10

11

12

13

14

15

16

17

18

19

20

21

22

23

1  
2  
3  
4  
5  
6  
7  
8  
9  
10  
11  
12  
13  
14  
15  
16  
17  
18  
19  
20  
21  
22  
23  
24

### **ABSTRACT**

COVID-19 is characterized by severe acute lung injury, which is associated with neutrophils infiltration and release of neutrophil extracellular traps (NETs). COVID-19 treatment options are scarce. Previous work has shown an increase in NETs release in the lung and plasma of COVID-19 patients suggesting that drugs that prevent NETs formation or release could be potential therapeutic approaches for COVID-19 treatment. Here, we report the efficacy of NET-degrading DNase I treatment in a murine model of COVID-19. DNase I decreased detectable levels of NETs, improved clinical disease, and reduced lung, heart, and kidney injuries in SARS-CoV-2-infected K18-hACE2 mice. Furthermore, our findings indicate a potential deleterious role for NETs lung tissue *in vivo* and lung epithelial (A549) cells *in vitro*, which might explain part of the pathophysiology of severe COVID-19. This deleterious effect was diminished by the treatment with DNase I. Together, our results support the role of NETs in COVID-19 immunopathology and highlight NETs disruption pharmacological approaches as a potential strategy to ameliorate COVID-19 clinical outcomes.

**Key words:** neutrophils, Neutrophil extracellular Traps, organ damage, COVID-19, SARS-CoV-2

1

2

### 3 **INTRODUCTION**

4 Coronavirus diseases 2019 (COVID-19) is an infection caused by the severe  
5 acute respiratory syndrome coronavirus 2 (SARS-CoV-2) (1, 2) and pulmonary-  
6 related symptoms are one of its hallmarks (3, 4). Neutrophils have been  
7 described as indicators of severity of respiratory symptoms and poor COVID-19  
8 prognosis (5–7). Neutrophil extracellular traps (NETs) are one of the most  
9 relevant effector mechanisms of neutrophils in inflammatory diseases, playing  
10 central role in organs damage (8–10).

11 NETs are web-like structures of extracellular DNA fibers containing histones and  
12 granule-derived enzymes, such as myeloperoxidase (MPO), neutrophil elastase,  
13 and cathepsin G (11, 12). The formation of NETs is known as NETosis, and it  
14 starts with neutrophil activation by pattern recognition receptors (TLRs, e.g) or  
15 chemokines. The process is followed by ROS production and calcium  
16 mobilization, which leads to the activation of protein arginine deiminase 4 (PAD-  
17 4) (13). The activation of the neutrophil elastase also plays a role in NETs  
18 production in inflammatory responses (14–17).

19 Elevated levels of NETs are found in the blood, thrombi, and lungs of patients  
20 with severe COVID-19, suggesting that neutrophils and NETs may play an  
21 important role in the pathophysiology of COVID-19 (8–10).

22 Drug repurposing is a key strategy to accelerate discovery of new effective  
23 treatments for COVID-19 (18). In this context, as the literature shows evidence of  
24 the role of NETs in COVID-19, DNase I, an FDA-approved drug that degrades

1 NETs could be proposed as a potential new candidate for COVID-19 treatment  
2 (19–21).

3 Here, we demonstrate that DNase I treatment decreases the concentration of  
4 NETs in the plasma and lungs of SARS-CoV-2-infected mice and ameliorates  
5 experimental COVID-19. These findings highlight the importance of NETs  
6 inhibitors as a potential therapeutic approach for COVID-19 treatment.

7

## 8 **RESULTS**

### 9 **DNase I reduces clinical outcomes in an experimental model of COVID-19**

10 To investigate the role of NETs in COVID-19 pathophysiology we used K18-  
11 hACE2 mouse intranasally infected with SARS-CoV-2; (22, 23). Infected mice  
12 were treated with saline or DNase I (10 mg/kg; s.c.) administered 1 h before virus  
13 infection and once daily up to 4 days after infection (**Figure 1A**). We evaluated  
14 body weight loss from baseline measure (basal) and clinical scores, as read out  
15 of disease progression. Our data showed that DNase I treatment attenuates both  
16 body weight loss and clinical score caused by SARS-CoV-2 infection compared  
17 to vehicle-treated mice (**Figure 1, B and C**).

18 We observed an increase in NETs concentration (**Figure 1, F and G**) and in the  
19 number of neutrophils in the lung of infected mice upon induction of the COVID-  
20 19 model (**Figure 1, D and E**). These data corroborate some findings published  
21 by either our group and other authors, showing the presence of systemic levels  
22 of NETs, as well as localized in pulmonary tissue from COVID-19 patients (8, 9,  
23 24).

1 DNase I treatment did not alter the number of neutrophils that infiltrated into lung  
2 tissue of SARS-CoV-2 infected mice. The FACS analysis showed that the  
3 frequency and absolute numbers of neutrophils (Ly6G+CD11b+ cells; **Figure 1,**  
4 **D and E**) were not altered by the treatment. Similar results were observed when  
5 analyzing CD45+ cell populations (**Supplemental Figure 1**). However, we  
6 demonstrate that DNase I treatment of SARS-CoV-2-infected mice resulted in a  
7 substantial reduction of NETs production that associates with lower disease  
8 score (**Figure 1H**). These data suggest that NETs play a crucial role in SARS-  
9 CoV-2 infection.

10

## 11 **Inhibition of NETs ameliorates lung pathology in SARS-CoV-2-infected** 12 **mice**

13 Lung inflammation is the primary cause of life-threatening respiratory disorder in  
14 critical and severe forms of COVID-19 (3, 4, 25). NETs have been identified in  
15 the lung tissue of SARS-CoV-2 infected patients and lung injury experimental  
16 animal models (8, 9, 26). Thus, we next investigated the effect of NETs  
17 degradation by DNase I treatment of the COVID-19 mouse model.

18 We noticed an extensive injury in lung tissue of K18-hACE2 infected mice with  
19 interstitial leukocyte infiltration. The alveolar units showed architectural distortion  
20 compromising the alveolar capillary barrier. DNase I treatment was able to  
21 prevent lung damage caused by SARS-CoV-2 infection (**Figure 2A**). Moreover,  
22 analyzing the area fraction, as score of septal thickness, DNase I-treatment  
23 reduced the area fraction in SARS-CoV-2-infected mice and was associated with  
24 lower concentration of NETs released (**Figure 2B**).

1

## 2 **DNase I attenuates extrapulmonary injuries in the COVID-19 mouse model**

3 COVID-19 is a systemic viral disease that can affect other vital organs besides  
4 the lungs, such as heart and kidney (27–30). To investigate this context, we  
5 harvested heart and kidney of animals 5 days post infection and evaluated  
6 whether NETs inhibition could change this phenotype. We observed that heart of  
7 mice infected with SARS-CoV-2 showed pathological changes in cardiac tissue  
8 with diffuse and sparse cardiac inflammatory cell infiltration and perivascular  
9 injury (**Figure 3A**). In addition, plasma Creatine Kinase MB (CK-MB)  
10 concentration in the infected group was higher than in control mice (**Figure 3B**).  
11 Interestingly, DNase I treatment attenuated the pathology and CK-MB  
12 concentration.

13 Finally, we aimed to investigate whether SARS-CoV-2 infection induces kidney  
14 damage in K18-hACE2 mice. Consistent with lung and heart pathological  
15 changes, we found the presence of ischemic tubulointerstitial nephritis in the  
16 COVID-19 model, mimicking acute tubular necrosis with cellular glomerulitis  
17 (**Figure 3C**). Furthermore, the levels of creatinine in the blood of infected mice  
18 were higher in comparison with uninfected animals (**Figure 3D**). As expected,  
19 DNase I treatment reduced kidney injury (**Figure 3, C and D**). Collectively, these  
20 findings indicate that pharmacological inhibition of NETs with DNase I prevents  
21 multi-organ dysfunction in COVID-19.

## 22 **DNase I prevents NETs-induced apoptosis of lung tissue in SARS-CoV-2-** 23 **infected mice**

1 To understand the possible role of NETs in the pathophysiology of COVID-19,  
2 we explored the hypothesis that NETs could be involved in the lung damaged  
3 accompanied by the disease, as previously described (9, 31).

4 To this end, lung analysis of k18-hACE2 mice infected with SARS-CoV-2 reveals  
5 a massive presence of apoptotic cells after 5 days of infection. DNase I treatment  
6 was able to prevent lung apoptosis caused by COVID-19 mouse model (**Figure**  
7 **4A**). Our analysis shown a reduction of approximately 60% in TUNEL positive  
8 cells after NETs degradation (**Figure 4B**).

9 In our next step, purified NETs from healthy human neutrophils were incubated  
10 with A549 cells, a human alveolar basal epithelial cell, and cell viability was  
11 determined (annexin V+ cells) by flow cytometry.

12 We found that exposure of A549 cells to purified NETs significantly increased the  
13 percentage of apoptotic cells in comparison with untreated cells. Importantly, the  
14 pretreatment of purified NETs with DNase I prevented NETs-induced epithelial  
15 (**Figure 4, C and D**) apoptosis to the similar levels observed in untreated cells.

16 Taken together, these results are evidence that DNase I exhibits a protective  
17 effect in NETs deleterious functions in lung tissue and could be a potential  
18 strategy to block organ injury during COVID-19.

19

## 20 **DISCUSSION**

21 While the number of patients with COVID-19 is growing worldwide, there is no  
22 effective treatment for the disease (32, 33). Thus, the understanding of the  
23 mechanisms by which the hosts deal with SARS-CoV-2 virus could allow the  
24 development of new therapeutic strategies aiming to prevent tissue injuries



1 triggered by the infection. Here, we report that in a COVID-19 mouse model,  
2 NETs are released systemically and in higher concentration in the lungs of K18-  
3 hACE2 mice. Moreover, DNase I treatment reduced multi-organ lesions and  
4 improved outcomes associated NETs released.

5 The increase in the number of circulating neutrophils is an indicator of a worse  
6 outcome of COVID-19 (34). In 2004, Brinkmann et al. described, for the first time,  
7 that NETs are released by neutrophils, and work as a microbicidal mediator (11).  
8 However, following studies demonstrated that NETs have a dual biological role.  
9 Besides their microbicidal ability, NETs mediate lesions observed in several  
10 inflammatory diseases, including rheumatoid arthritis, lupus, diabetes, and sepsis  
11 (8, 10, 35–39). In fact, inhibition of NETs production prevented lung, heart and  
12 liver lesions observed in experimental sepsis (38–40).

13 There are several stimuli that trigger NETs release, including pathogen-  
14 associated molecular patterns (PAMPs), damage-associated molecular patterns  
15 (DAMPs) and inflammatory mediators, such as cytokines and chemokines (41–  
16 43). Our group have previously demonstrated that SARS-CoV-2 can directly  
17 infect human neutrophils and is key to trigger NETs production. The first step in  
18 neutrophil infection by SARS-CoV-2 is the interaction of the virus with ACE2 and  
19 TMPRSS2 expressed in the surface of human neutrophils (8). It is possible to  
20 speculate the participation of the cytokines and chemokines released by host  
21 cells as activators (44, 45) of NETs production by the neutrophils in the K18-  
22 hACE2 model; however, this deserves future investigation.

23 The literature describes that NETs can present direct cytotoxic effects on different  
24 mammalian cell types, including epithelial and endothelial cells, inducing  
25 apoptosis or necrosis (12, 46). Moreover, NETs could also activate different PRR

1 receptors, such as toll-like receptor (TLR)-4 and 9, which mediate the release of  
2 inflammatory mediators; in turn, amplifying the direct effects of NETs (35). In this  
3 context, during COVID-19, apoptosis of lung epithelial was previously observed.  
4 These events are capable of compromising the lung function, worsening the  
5 severity of the disease (3, 4). Considering these findings, in the present study,  
6 we observed that DNase I prevented apoptosis in lung tissue from SARS-CoV-2-  
7 infected mice. In accordance observed in COVID-19 model, isolated NETs from  
8 culture of PMA-stimulated human neutrophils induced *in vitro* apoptosis of  
9 epithelial cells with reversal homeostasis in presence of DNase I. Extending this  
10 finding to COVID-19 disease, it is possible to suggest that the reduction of viability  
11 of the lung cells is a consequence of local production of NETs. In this line, we  
12 observed the presence of neutrophils releasing NETs, as well as high  
13 concentration of NETs in the lung of SARS-CoV-2-infected mice. Finally,  
14 supporting these finds, we observed the presence of neutrophils releasing NETs  
15 in the lung tissue of infected mice, detected in the alveolar space. Disease  
16 progression was prevented with DNase I treatment *in vivo*. This observation is  
17 tightly correlated with the development of lung injury, suggesting that strategies  
18 to reduce NETs levels could have favorable effects on recovering lung function.  
19 Together, our findings demonstrate the potentially deleterious role of NETs during  
20 COVID-19 and support the use of inhibitors of NETs, such as DNase I as a  
21 strategy to ameliorate multi-organ damage during COVID-19.

22

## 23 **MATERIALS AND METHODS**

### 24 **K18-hACE2 mice**

1 K18-hACE2 humanized mice (B6.Cg-Tg(K18-ACE2)2PrImn/J) were obtained  
2 from The Jackson Laboratory and were bred in the *Centro de Criação de Animais*  
3 *Especiais* (Ribeirão Preto Medical School/University of São Paulo). This mouse  
4 strain has been previously used as model for SARS-CoV-2-induced disease and  
5 it presents signs of diseases, and biochemical and lung pathological changes  
6 compatible with the human disease (23). Mice had access to water and food ad  
7 libitum. The manipulation of these animals was performed in Biosafety Levels 3  
8 (BSL3) facility and the study was approved by Ethics Committee on the Use of  
9 Animals of the Ribeirão Preto Medical School, University of São Paulo  
10 (#066/2020).

11

## 12 **DNase I treatment in SARS-CoV-2 experimental infection**

13 Male K18-hACE2 mice, aged 8 weeks, were infected with  $2 \times 10^4$  PFU of SARS-  
14 CoV-2 (in 40  $\mu$ L) by intranasal route. Uninfected mice (n=5) were given an equal  
15 volume of PBS through the same route. On the day of infection, 1 h before virus  
16 inoculation, animals were treated with DNase I (10 mg/kg, s.c., Pulmozyme,  
17 Roche) (n = 6) or vehicle (PBS, s.c.) (n = 6). DNase I was also given once a day  
18 until 5 days post-infection. Body weight was evaluated on the baseline and on all  
19 days post-infection. The right lung was collected, harvested, and homogenized  
20 in PBS with steel glass beads. The homogenate was added to TRIzol reagent  
21 (1:1), for posterior viral titration via RT-qPCR, or to lysis buffer (1:1), for ELISA  
22 assay, and stored at -70 °C. The left lung was collected in paraformaldehyde  
23 (PFA, 4%) for posterior histological assessment.

24

## 1 **H&E staining and lung pathology evaluation**

2 Five  $\mu\text{m}$  lung, heart and kidney slices were submitted to Hematoxylin and Eosin  
3 staining. A total of 10 photomicrographs in 40X magnification per animal were  
4 randomly obtained using a microscope ScanScope (Olympus) and Leica.  
5 Morphometric analysis was performed in accordance with the protocol  
6 established by the American Thoracic Society and European Thoracic Society  
7 (ATS/ERS) (47).

8

## 9 **NETs quantification**

10 Plasma or homogenate from lung were incubated overnight in a plate pre-coated  
11 with anti-MPO antibody (Thermo Fisher Scientific; cat. PA5-16672) at 4°C. The  
12 plate was washed with PBS-T (Phosphate-Buffered Saline with Tween 20). Next,  
13 samples were incubated overnight at 4°C. Finally, the plate with samples was  
14 washed and over MPO-bound DNA was quantified using the Quant-iT PicoGreen  
15 kit (Invitrogen; cat. P11496).

16

## 17 **Immunofluorescence and confocal microscopy**

18 Lungs were harvested and fixed with PFA 4%. After dehydration and paraffin  
19 embedding, 5  $\mu\text{m}$  sections were prepared. The slides were deparaffinized and  
20 rehydrated by immersing the through Xylene and 100% Ethanol 90% for 15  
21 minutes, each solution. Antigen retrieval was performed with 1.0 mM EDTA, 10  
22 mM Trizma-base, pH 9.0 at 95°C for 30 minutes. Later, endogenous peroxidase  
23 activity was quenched by incubation of the slides in 5%  $\text{H}_2\text{O}_2$  in methanol for 15  
24 minutes. After blocking with IHC Select Blocking Reagent (Millipore, cat. 20773-

1 M) for 2 hours at room temperature (RT), the following primary antibodies were  
2 incubated overnight at 4°C: rabbit polyclonal anti- myeloperoxidase (anti-MPO;  
3 Thermo Fisher Scientific; cat. PA5-16672; 1:100) and rabbit polyclonal, anti-  
4 histone H3 (H3Cit; Abcam; cat. ab5103; 1:100). The slides were then washed  
5 with TBS-T (Tris-Buffered Saline with Tween 20) and incubated with secondary  
6 antibodies alpaca anti-rabbit IgG AlexaFluor 488 (Jackson ImmunoResearch;  
7 Cat. 615-545-215; 1:1000) and alpaca anti-rabbit IgG AlexaFluor 594 (Jackson  
8 ImmunoResearch; Cat. 611-585-215; 1:1000). Autofluorescence was quenched  
9 using the TrueVIEW Autofluorescence Quenching Kit (Vector Laboratories, cat.  
10 SP-8400-15). Slides were then mounted using Vectashield Antifade Mounting  
11 Medium with DAPI (Vector Laboratories, Cat# H-1200-10). Images were acquired  
12 by Axio Observer combined with a LSM 780 confocal microscope (Carl Zeiss) at  
13 63X magnification at the same setup (zoom, laser rate) and tile-scanned at 4  
14 fields/image. Images were analyzed with Fiji by Image J.

15

## 16 **Measurement of organ damage biomarkers**

17 Renal dysfunction was assessed by the levels of blood creatinine; and creatine  
18 kinase-MB was used as an index of cardiac lesions. The determinations were  
19 performed using a commercial kit (Bioclin).

20

## 21 **Neutrophils isolation and NETs purification**

22 Peripheral blood samples were collected from healthy controls by venipuncture  
23 and the neutrophil population was isolated by Percoll density gradient (GE  
24 Healthcare; cat. 17-5445-01). Isolated neutrophils ( $1.5 \times 10^7$  cells) were

1 stimulated with 50 nM of PMA (Sigma-Aldrich; cat. P8139) for 4 h at 37°C. The  
2 medium containing NETs was centrifuged at 450 g to remove cellular debris for  
3 10 minutes, and NETs-containing supernatants were collected and centrifuged at  
4 18,000 g for 20 minutes. Supernatants were removed, and DNA pellets were  
5 resuspended in PBS. NETs were then quantified with a GeneQuant (Amersham  
6 Biosciences Corporation).

7

### 8 **Apoptosis assay**

9 Lung tissue were harvested for detection of apoptotic cells *in situ* with Click-iT  
10 Plus TUNEL Assay Alexa Fluor 488, according to the manufacturer's instructions  
11 (Thermo Fisher Scientific; cat. C10617). Human alveolar basal epithelial A549  
12 cells ( $5 \times 10^4$ ) were maintained in DMEM and cultured with purified NETs (10  
13 ng/ml) pretreated, or not, with DNase I (0.5 mg/ml; Pulmozyme, Roche). The  
14 cultures were then incubated for 24 h at 37°C. Viability was determined by flow  
15 cytometric analysis of Annexin V staining.

16

### 17 **Flow cytometry**

18 Lung tissue was harvested and digested with type 2 collagenase to acquire cell  
19 suspensions. Cells were then stained with Fixable Viability Dye eFluor 780  
20 (eBioscience; cat. 65-0865-14; 1:3,000) and monoclonal antibodies specific for  
21 CD45 (BioLegend; clone 30-F11; cat. 103138; 1:200), CD11b (BD Biosciences;  
22 clone M1/70; cat. 553311) and Ly6G (Biolegend; clone 1A8; cat. 127606) for 30  
23 min at 4°C. A549 cells ( $1 \times 10^5$ ) were stained with FITC ApoScreen Annexin V  
24 Apoptosis Kit (SouthernBiotech; cat. 10010-02), according to the manufacturer's

1 instructions. Data were collected on a FACSVerse (BD Biosciences) and  
2 analyzed with FlowJo (TreeStar).

3

#### 4 **Statistics**

5 Statistical significance was determined by either two-tailed unpaired Student t  
6 test, one-way or two-way ANOVA followed by Bonferroni's post hoc test.  $P < 0.05$   
7 was considered statistically significant. Statistical analyses and graph plots were  
8 performed and built with GraphPad Prism 9.3.1 software.

9

#### 10 **Acknowledgments**

11 We are grateful to Marcella Daruge Grando, Roberta Rosales, Soraya Jabur  
12 Badra, Andreia Nogueira, and Juliana Trench Abumansur for technical  
13 assistance. This research was supported by Fundação de Amparo à Pesquisa  
14 do Estado de São Paulo (FAPESP) grants (2013/08216-2 and 2020/05601-6),  
15 Conselho Nacional de Desenvolvimento Científico e Tecnológico (CNPq) and  
16 Coordenação de Aperfeiçoamento de Pessoal de Nível Superior (CAPES)  
17 grants.

18

#### 19 **Author contributions**

20 F.P. Veras, G.F. Gomes, F.Q. Cunha, T.M. Cunha, J.C. Alves-Filho, E. Arruda  
21 and A.T. Fabro contributed to the study design. F.P. Veras, G.F. Gomes, E.S.  
22 Corneo, R. Martins and, B.M.S. Silva performed SARS-CoV-2 K18-hACE2 mice  
23 infection *in vivo*. F.P. Veras performed immunostaining and confocal analysis.  
24 A.H. Schneider, C.J.L.R. Almeida, and C.M.S. Silva performed NETs  
25 quantification. S.S. Batah, A.T. Fabro contributed to histopathological analysis.

1 F.P. Veras and B.M.S. Silva performed A549 epithelial cell damage assay and  
2 FACS analysis. A.H. Schneider performed the purification of NETs. F.P. Veras,  
3 R. Martins, C.S Bonilha, E. Arruda F.Q. Cunha, T.M. Cunha, and J.C. Alves-Filho,  
4 wrote the manuscript. All authors read and approved the manuscript.

5

## 6 **Funding**

7 This research was supported by Fundação de Amparo à Pesquisa do Estado de  
8 São Paulo grants (2013/08216-2 and 2020/05601-6), Conselho Nacional de  
9 Desenvolvimento Científico e Tecnológico (CNPq) and Coordenação de  
10 Aperfeiçoamento de Pessoal de Nível Superior (CAPES-Epidemias,  
11 88887.513530/2020-00) grants.

12

## 13 **Competing Interests**

14 The authors declare no competing interests.

15

## 16 **REFERENCES**

- 17 1. Wu Z, McGoogan JM. Characteristics of and Important Lessons From the  
18 Coronavirus Disease 2019 (COVID-19) Outbreak in China. *JAMA*  
19 [published online ahead of print: 2020]; doi:10.1001/jama.2020.2648
- 20 2. Guan W, et al. Clinical Characteristics of Coronavirus Disease 2019 in  
21 China. *N. Engl. J. Med.* [published online ahead of print: 2020];  
22 doi:10.1056/nejmoa2002032
- 23 3. Dolhnikoff M, et al. Pathological evidence of pulmonary thrombotic  
24 phenomena in severe COVID-19. *J. Thromb. Haemost.* [published online  
25 ahead of print: 2020]; doi:10.1111/jth.14844



- 1 4. Batah SS, et al. COVID-19 bimodal clinical and pathological phenotypes.  
2 *Clin. Transl. Med.* 2022;12(1). doi:10.1002/CTM2.648
- 3 5. Skendros P, et al. Complement and tissue factor-enriched neutrophil  
4 extracellular traps are key drivers in COVID-19 immunothrombosis. *J.*  
5 *Clin. Invest.* [published online ahead of print: August 6, 2020];  
6 doi:10.1172/JCI141374
- 7 6. Reusch N, et al. Neutrophils in COVID-19. *Front. Immunol.* 2021;12:952.
- 8 7. Schulte-Schrepping J, et al. Severe COVID-19 Is Marked by a  
9 Dysregulated Myeloid Cell Compartment. *Cell* 2020;182(6):1419-  
10 1440.e23.
- 11 8. Veras FP, et al. SARS-CoV-2-triggered neutrophil extracellular traps  
12 mediate COVID-19 pathology SARS-CoV-2 directly triggers ACE-  
13 dependent NETs. *J. Exp. Med.* 2020;217(12). doi:10.1084/jem.20201129
- 14 9. Middleton EA, et al. Neutrophil Extracellular Traps (NETs) Contribute to  
15 Immunothrombosis in COVID-19 Acute Respiratory Distress Syndrome..  
16 *Blood* [published online ahead of print: June 29, 2020];  
17 doi:10.1182/blood.2020007008
- 18 10. Zuo Y, et al. Neutrophil extracellular traps in COVID-19. *JCI insight*  
19 [published online ahead of print: 2020]; doi:10.1172/jci.insight.138999
- 20 11. Brinkmann V, et al. Neutrophil Extracellular Traps Kill Bacteria. *Science*  
21 (80-. ). 2004;303(5663):1532–1535.
- 22 12. Jorch SK, Kubes P. An emerging role for neutrophil extracellular traps in  
23 noninfectious disease. *Nat. Med.* 2017;23(3):279–287.

- 1 13. Li P, et al. PAD4 is essential for antibacterial innate immunity mediated by  
2 neutrophil extracellular traps. *J. Exp. Med.* [published online ahead of  
3 print: 2010]; doi:10.1084/jem.20100239
- 4 14. Paryzhak S, et al. Neutrophil-released enzymes can influence  
5 composition of circulating immune complexes in multiple sclerosis.  
6 *Autoimmunity* [published online ahead of print: 2018];  
7 doi:10.1080/08916934.2018.1514390
- 8 15. Saffarzadeh M, et al. Neutrophil extracellular traps directly induce  
9 epithelial and endothelial cell death: A predominant role of histones. *PLoS*  
10 *One* [published online ahead of print: 2012];  
11 doi:10.1371/journal.pone.0032366
- 12 16. Henry CM, et al. Neutrophil-Derived Proteases Escalate Inflammation  
13 through Activation of IL-36 Family Cytokines. *Cell Rep.* 2016;14(4):708–  
14 722.
- 15 17. Toussaint M, et al. Host DNA released by NETosis promotes rhinovirus-  
16 induced type-2 allergic asthma exacerbation. *Nat. Med.* 2017;23(6):681–  
17 691.
- 18 18. Venkatesan P. Repurposing drugs for treatment of COVID-19. *Lancet*  
19 *Respir. Med.* 2021;9(7):e63.
- 20 19. MacConnachie AM. Dornase-alfa (DNase, Pulmozyme) for cystic fibrosis.  
21 *Intensive Crit. care Nurs.* 1998;14(2):101–102.
- 22 20. Ranasinha C, et al. Efficacy and safety of short-term administration of  
23 aerosolised recombinant human DNase I in adults with stable stage cystic  
24 fibrosis. *Lancet* [published online ahead of print: 1993]; doi:10.1016/0140-

- 1           6736(93)92297-7
- 2   21.   Holliday ZM, et al. Non-Randomized Trial of Dornase Alfa for Acute  
3        Respiratory Distress Syndrome Secondary to Covid-19. *Front. Immunol.*  
4        2021;12. doi:10.3389/FIMMU.2021.714833
- 5   22.   Dong W, et al. The K18-Human ACE2 Transgenic Mouse Model  
6        Recapitulates Non-severe and Severe COVID-19 in Response to an  
7        Infectious Dose of the SARS-CoV-2 Virus. *J. Virol.* 2022;96(1).  
8        doi:10.1128/JVI.00964-21
- 9   23.   Golden JW, et al. Human angiotensin-converting enzyme 2 transgenic  
10        mice infected with SARS-CoV-2 develop severe and fatal respiratory  
11        disease. *JCI Insight* 2020;5(19). doi:10.1172/JCI.INSIGHT.142032
- 12   24.   Zuo Y, et al. Neutrophil extracellular traps in COVID-19. *JCI Insight*  
13        [published online ahead of print: 2020]; doi:10.1172/jci.insight.138999
- 14   25.   Zhang H, et al. Histopathologic Changes and SARS-CoV-2  
15        Immunostaining in the Lung of a Patient With COVID-19. *Ann. Intern.*  
16        *Med.* [published online ahead of print: 2020]; doi:10.7326/M20-0533
- 17   26.   Becker K, et al. Vasculitis and Neutrophil Extracellular Traps in Lungs of  
18        Golden Syrian Hamsters With SARS-CoV-2. *Front. Immunol.*  
19        2021;12:1125.
- 20   27.   Tian S, et al. Pathological study of the 2019 novel coronavirus disease  
21        (COVID-19) through postmortem core biopsies. *Mod. Pathol.* [published  
22        online ahead of print: 2020]; doi:10.1038/s41379-020-0536-x
- 23   28.   Chen T, et al. Clinical characteristics of 113 deceased patients with  
24        coronavirus disease 2019: Retrospective study. *BMJ* [published online

- 1 ahead of print: 2020]; doi:10.1136/bmj.m1091
- 2 29. Su H, et al. Renal histopathological analysis of 26 postmortem findings of  
3 patients with COVID-19 in China. *Kidney Int.* [published online ahead of  
4 print: 2020]; doi:10.1016/j.kint.2020.04.003
- 5 30. Hin Chu P†, et al. Comparative tropism, replication kinetics, and cell  
6 damage profiling of SARS-CoV-2 and SARS-CoV with implications for  
7 clinical manifestations, transmissibility, and laboratory studies of COVID-  
8 19: an observational study. *The Lancet Microbe* 2020;
- 9 31. Barnes BJ, et al. Targeting potential drivers of COVID-19: Neutrophil  
10 extracellular traps. *J. Exp. Med.* [published online ahead of print: 2020];  
11 doi:10.1084/jem.20200652
- 12 32. Sanders JM, et al. Pharmacologic Treatments for Coronavirus Disease  
13 2019 (COVID-19): A Review. *JAMA* 2020;323(18):1824–1836.
- 14 33. Fenton C, Keam SJ. Emerging small molecule antivirals may fit neatly into  
15 COVID-19 treatment. *Drugs Ther. Perspect. Ration. drug Sel. use*  
16 [published online ahead of print: February 28, 2022];  
17 doi:10.1007/S40267-022-00897-8
- 18 34. Yang AP, et al. The diagnostic and predictive role of NLR, d-NLR and  
19 PLR in COVID-19 patients. *Int. Immunopharmacol.* [published online  
20 ahead of print: 2020]; doi:10.1016/j.intimp.2020.106504
- 21 35. Schneider AH, et al. Neutrophil extracellular traps mediate joint  
22 hyperalgesia induced by immune inflammation. *Rheumatology (Oxford).*  
23 2021;60(7):3461–3473.
- 24 36. O’neil LJ, Kaplan MJ, Carmona-Rivera C. The Role of Neutrophils and

- 1 Neutrophil Extracellular Traps in Vascular Damage in Systemic Lupus  
2 Erythematosus. *J. Clin. Med.* 2019;8(9). doi:10.3390/JCM8091325
- 3 37. Wong SL, et al. Diabetes primes neutrophils to undergo NETosis, which  
4 impairs wound healing. *Nat. Med.* [published online ahead of print: 2015];  
5 doi:10.1038/nm.3887
- 6 38. Silva CM, et al. Gasdermin D inhibition prevents multiple organ  
7 dysfunction during sepsis by blocking NET formation. *Blood* [published  
8 online ahead of print: August 18, 2021];  
9 doi:10.1182/BLOOD.2021011525/476604/GASDERMIN-D-INHIBITION-  
10 PREVENTS-MULTIPLE-ORGAN
- 11 39. Colón DF, et al. Neutrophil extracellular traps (NETs) exacerbate severity  
12 of infant sepsis. *Crit. Care* [published online ahead of print: 2019];  
13 doi:10.1186/s13054-019-2407-8
- 14 40. Czaikoski PG, et al. Neutrophil extracellular traps induce organ damage  
15 during experimental and clinical sepsis. *PLoS One* [published online  
16 ahead of print: 2016]; doi:10.1371/journal.pone.0148142
- 17 41. Saitoh T, et al. Neutrophil extracellular traps mediate a host defense  
18 response to human immunodeficiency virus-1.. *Cell Host Microbe*  
19 [published online ahead of print: 2012]; doi:10.1016/j.chom.2012.05.015
- 20 42. Funchal GA, et al. Respiratory syncytial virus fusion protein promotes  
21 TLR-4-dependent neutrophil extracellular trap formation by human  
22 neutrophils. *PLoS One* [published online ahead of print: 2015];  
23 doi:10.1371/journal.pone.0124082
- 24 43. Hiroki CH, et al. Neutrophil Extracellular Traps Effectively Control Acute

- 1 Chikungunya Virus Infection. *Front. Immunol.* [published online ahead of  
2 print: 2020]; doi:10.3389/fimmu.2019.03108
- 3 44. Nie M, et al. Neutrophil Extracellular Traps Induced by IL8 Promote  
4 Diffuse Large B-cell Lymphoma Progression via the TLR9 Signaling. *Clin.*  
5 *Cancer Res.* 2019;25(6):1867–1879.
- 6 45. Keshari RS, et al. Cytokines Induced Neutrophil Extracellular Traps  
7 Formation: Implication for the Inflammatory Disease Condition. *PLoS One*  
8 [published online ahead of print: 2012]; doi:10.1371/journal.pone.0048111
- 9 46. Yipp BG, et al. Dynamic NETosis is Carried Out by Live Neutrophils in  
10 Human and Mouse Bacterial Abscesses and During Severe Gram-  
11 Positive Infection. *Nat. Med.* [published online ahead of print: 2015];  
12 doi:10.1038/nm.2847
- 13 47. Hsia CCW, et al. An Official Research Policy Statement of the American  
14 Thoracic Society/European Respiratory Society: Standards for  
15 Quantitative Assessment of Lung Structure. *Am. J. Respir. Crit. Care Med.*  
16 2010;181(4):394.

## 17

### 18 **Figures Legends**

19 **Figure 1 – DNase I reduces clinical outcomes in a COVID-19 experimental**  
20 **model. (a)** K18-hACE2 mice (n=6) were intranasally (i.n) inoculated with SARS-  
21 CoV-2 ( $2 \times 10^4$  PFU) and treated with DNase I (10mg/kg, s.c) for 5 days. Created  
22 with Biorender.com. Uninfected group was used as negative control (n=5).  
23 Weight loss and clinical scores were analyzed **(b, c)**. Representative dot plots  
24 **(d)**, frequency and total number **(e)** of Ly6G+CD11b+ cells assessed by flow

1 cytometry. **(f)** NETs quantification by MPO-DNA PicoGreen assay from serum  
2 and lung tissue homogenate. **(g)** Immunofluorescence analysis of H3Cit (green)  
3 and MPO (red) expression from the lung of SARS-CoV-2-infected mice and  
4 treated with DNase I. DAPI (blue) was used for nuclei staining. Scale bar  
5 indicates 50  $\mu\text{m}$ . **(h)** Pearson's correlation between body weight or clinical score  
6 and NETs concentration in lung homogenate. Data are representative of at least  
7 two independent experiments and are shown as mean  $\pm$  SEM. P values were  
8 determined by two-way **(b, c)** and one-way ANOVA **(e, f)**.

9

10 **Figure 2 – Pharmacological degradation of NETs ameliorates lung**  
11 **pathology upon SARS-CoV-2 infection *in vivo*.** K18-hACE2 mice (n=6) were  
12 intranasally (i.n) inoculated with SARS-CoV-2 ( $2 \times 10^4$  PFU) and treated with  
13 DNase I (10mg/kg, s.c) for 5 days. **(a)** Representative H&E staining from the lung  
14 of mock or SARS-CoV-2-infected mice and treated with DNase I. **(b)** Pearson  
15 correlation between the area fraction and NETs concentration in lung  
16 homogenate. Data are representative of two independent experiments and are  
17 shown as mean  $\pm$  SEM. P values were determined by one-way ANOVA.

18

19 **Figure 3 – NETs degradation attenuates heart and kidney failure in a COVID-**  
20 **19 experimental model.** K18-hACE2 mice (n=6) were intranasally (i.n)  
21 inoculated with SARS-CoV-2 ( $2 \times 10^4$  PFU) and treated with DNase I (10mg/kg,  
22 s.c) for 5 days. Representative H&E staining from heart **(a)** and kidney **(c)** of  
23 mock, SARS-CoV-2-infected mice and treated with DNase I. Serum levels of  
24 creatine kinase-MB (CK-MB) **(b)** and creatinine **(d)** determined by colorimetric

1 assays. Data are representative of two independent experiments and are shown  
2 as mean  $\pm$  SEM. P values were determined by one-way ANOVA.

3

4 **Figure 4 – DNase I prevents apoptosis of lung tissue and lung epithelial**  
5 **cells.** K18-hACE2 mice (n=6) were intranasally (i.n) inoculated with SARS-CoV-  
6 2 ( $2 \times 10^4$  PFU) and treated with DNase I (10mg/kg, s.c) for 5 days. **(a)** TUNEL  
7 staining (green) for detection of apoptotic cells *in situ* from lung tissue of mice.  
8 **(b)** Percentage of TUNEL positive cells in lung tissue. NETs were purified from  
9 healthy neutrophils and stimulated with PMA (50 nM) for 4 h at 37°C **(c)**  
10 Representative dot plots of FACS analysis of Annexin V+ A549 cells incubated  
11 with purified NETs (10 ng/ml) pretreated, or not, with DNase I (0.5 mg/ml) for 24  
12 h at 37°C. **(d)** Frequency of Annexin V+ A549. Data are representative of two  
13 independent experiments and are shown as mean  $\pm$  SEM. P values were  
14 determined by one-way ANOVA followed by Bonferroni's post hoc test.

15

16 **Figure S1 – DNase I treatment does not alter leukocyte accumulation in the**  
17 **lungs of SARS-CoV-2-infected mice.** K18-hACE2 mice (n=6) were intranasally  
18 (i.n) inoculated with SARS-CoV-2 ( $2 \times 10^4$  PFU) and treated with DNase I  
19 (10mg/kg, s.c) for 5 days. **(a)** Doublets, debris, and dead cells were first excluded.  
20 Leukocytes were identified as CD45+ events among viable cells. **(b)** Flow  
21 cytometry analyses of CD45+ living cells from the lung of K18-hACE2 infected  
22 mice treated or not with DNase I. Uninfected was used as control. Data are  
23 representative of two independent experiments and are shown as mean  $\pm$  SEM.  
24 P values were determined by one-way ANOVA followed by Bonferroni's post hoc  
25 test.



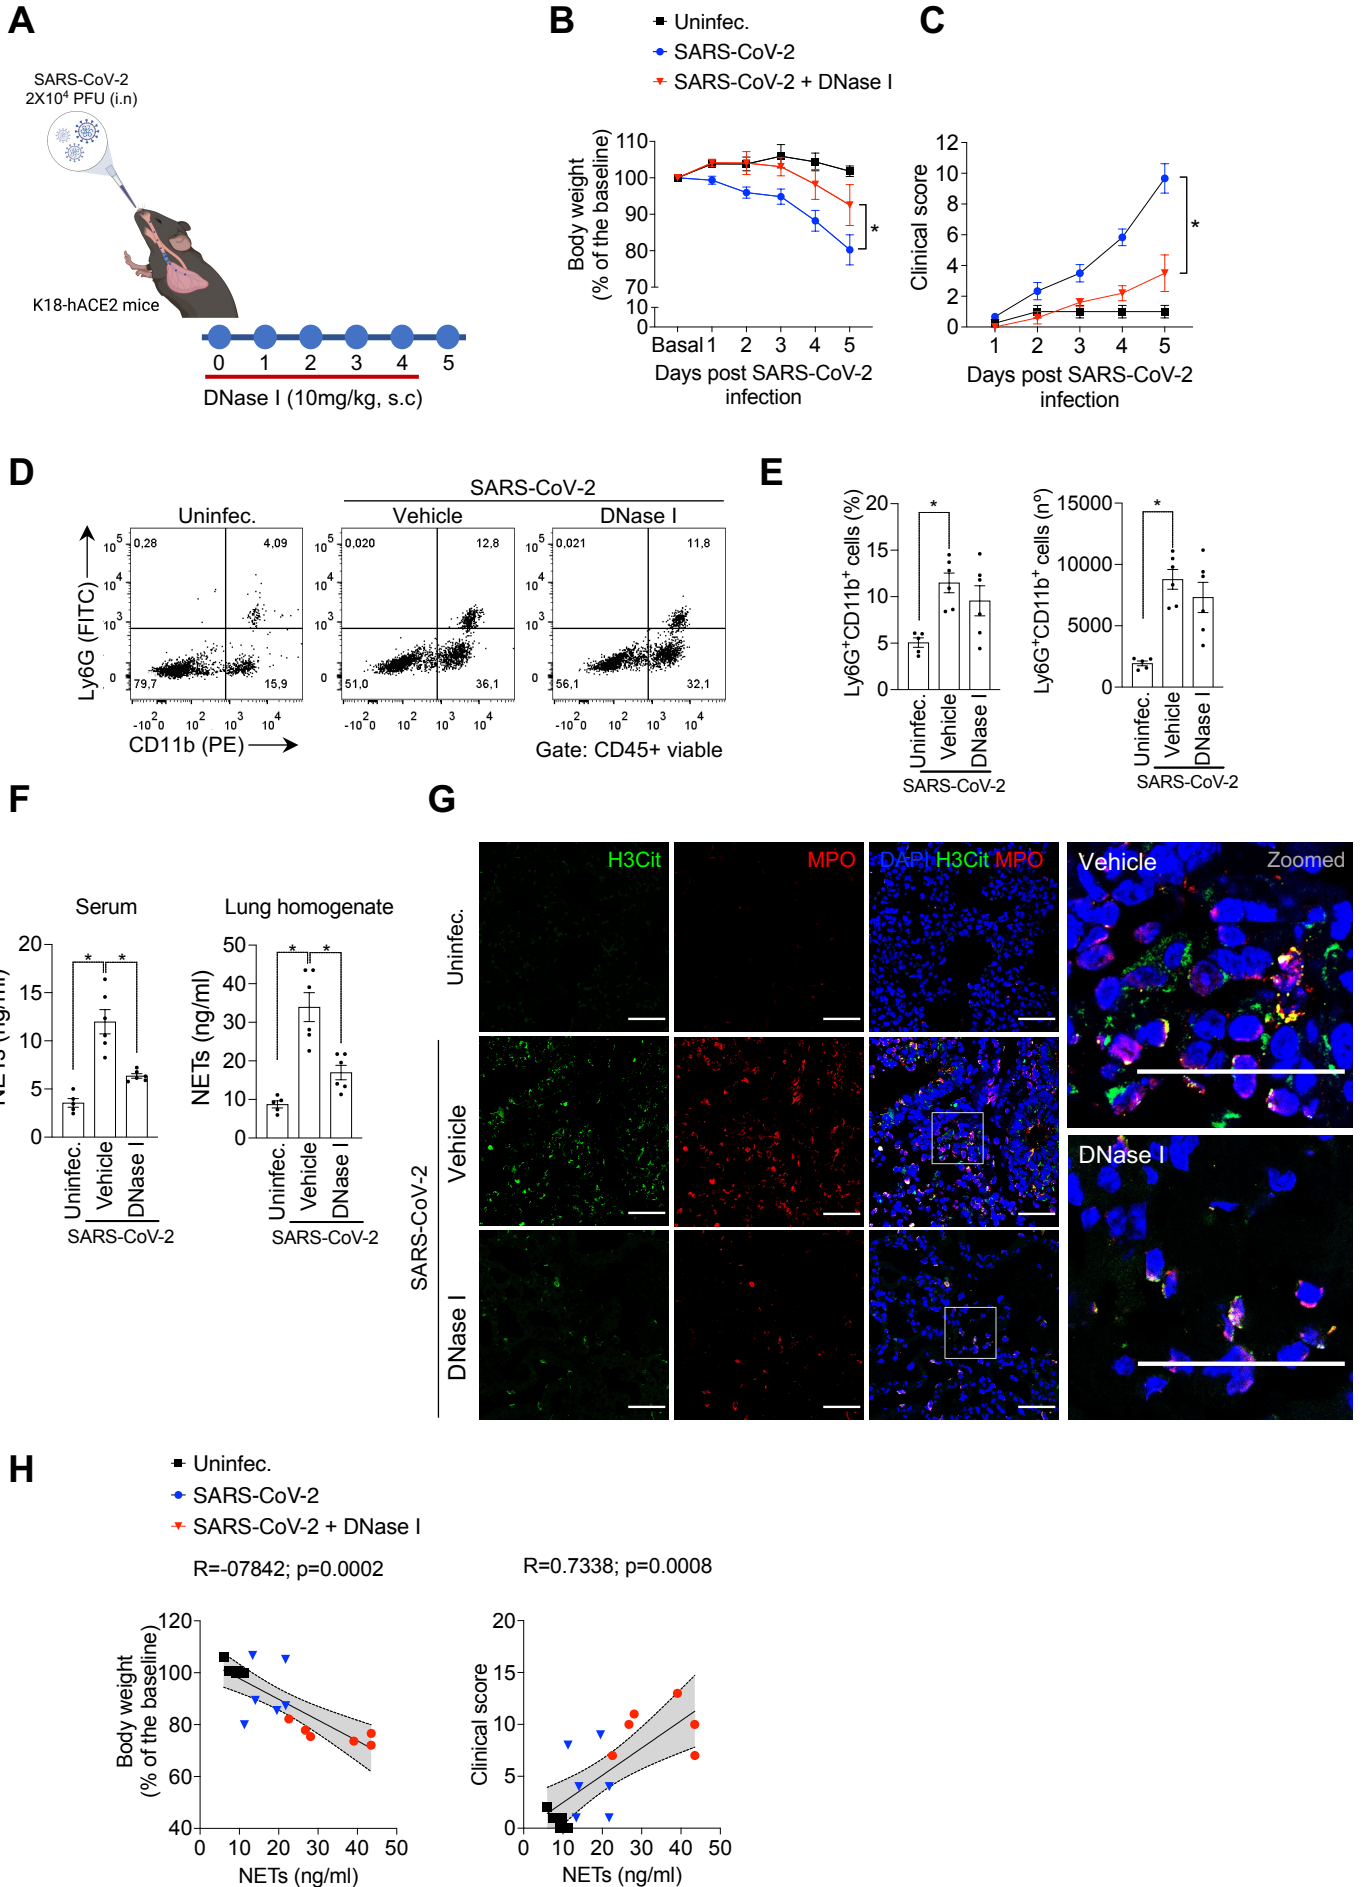

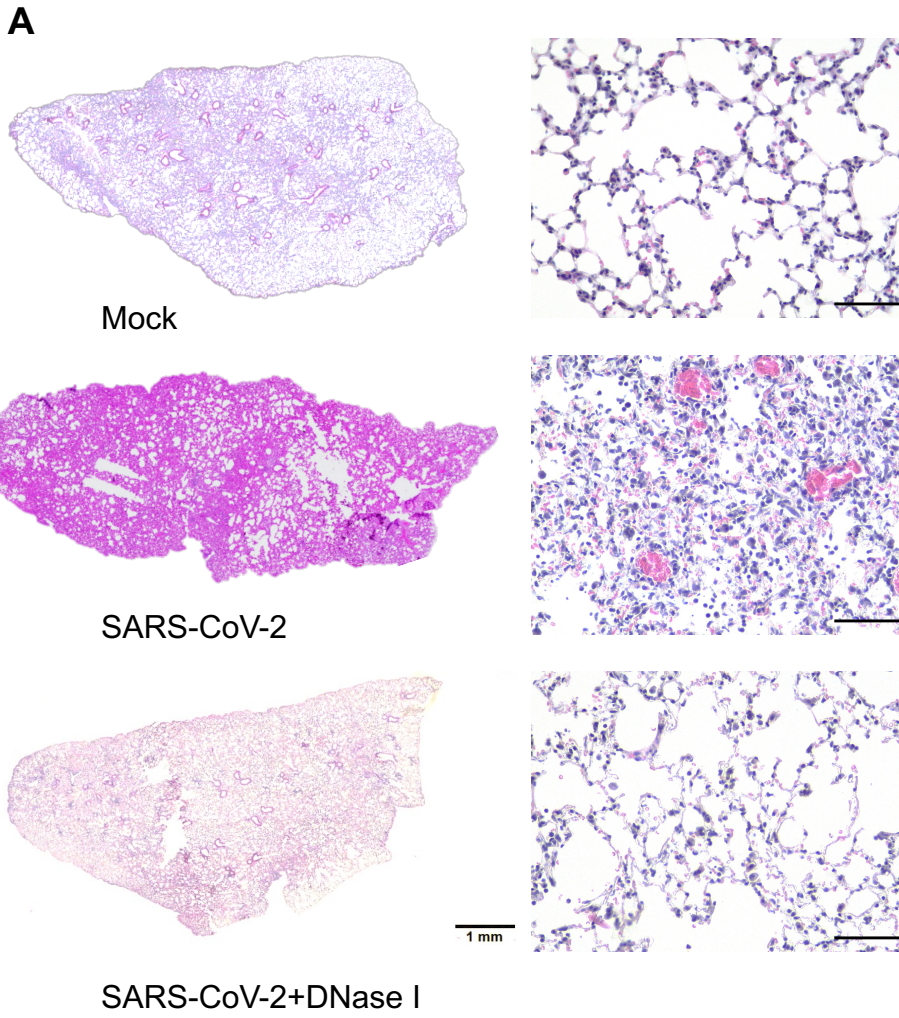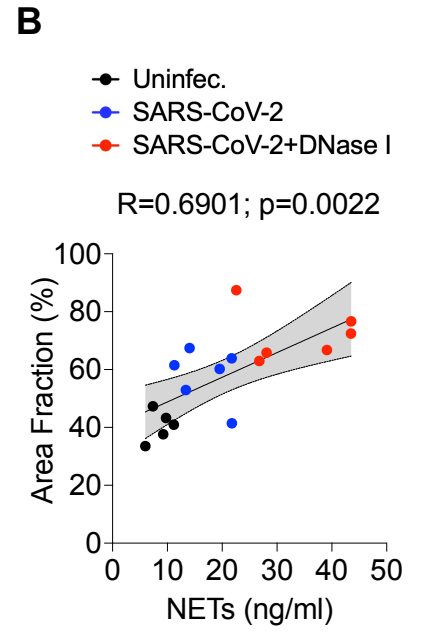

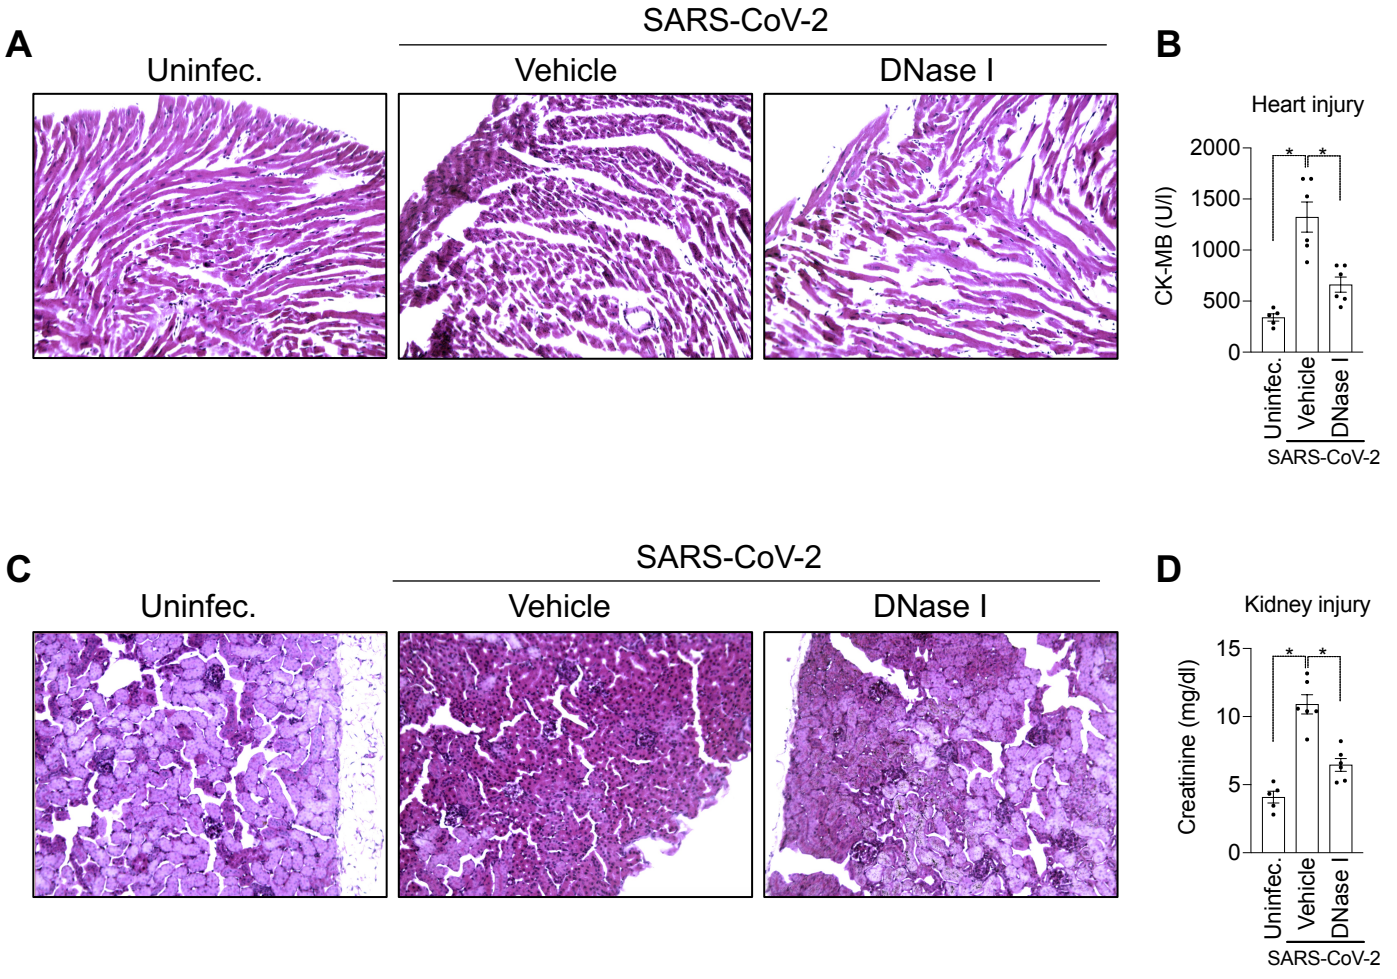

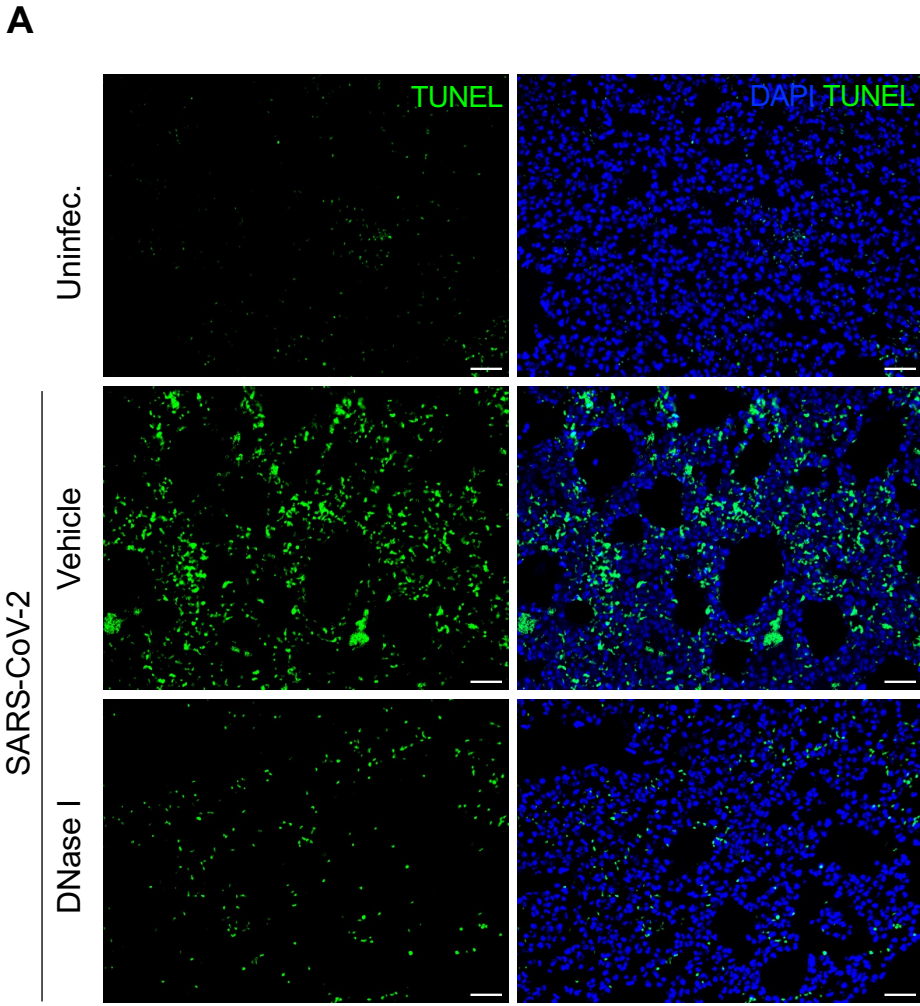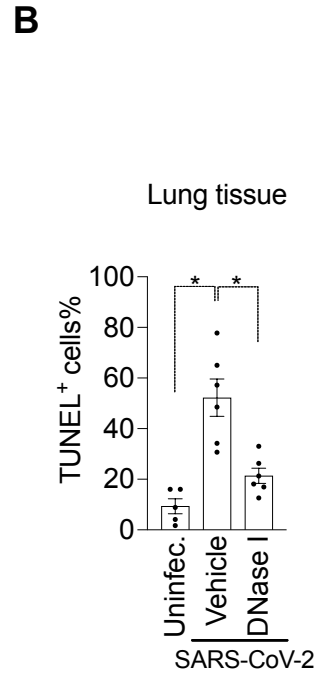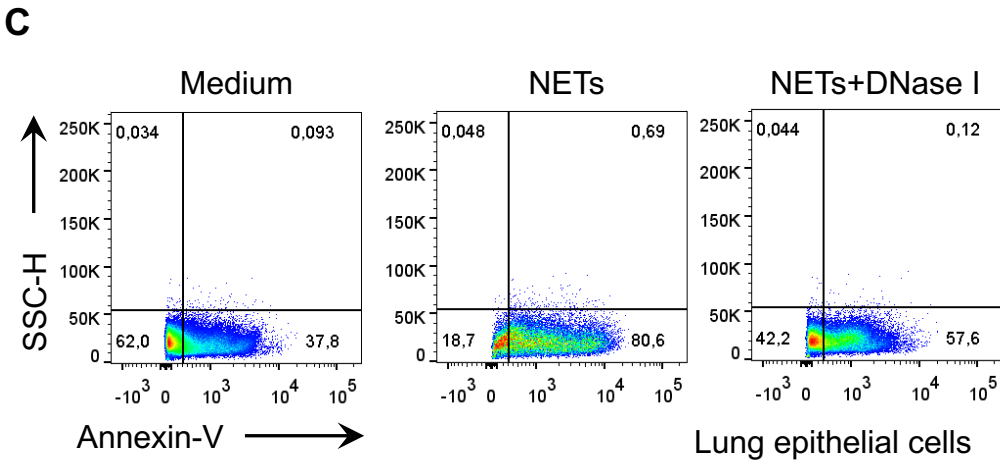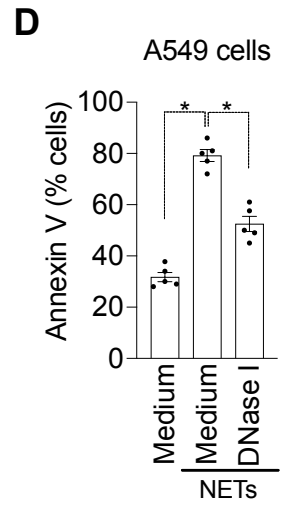

A

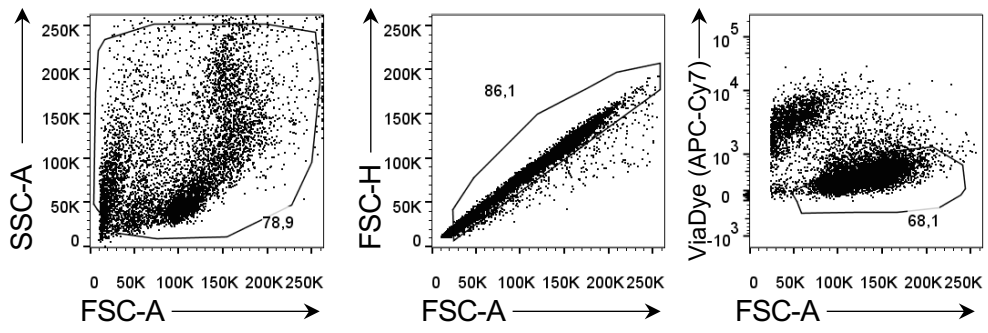

B

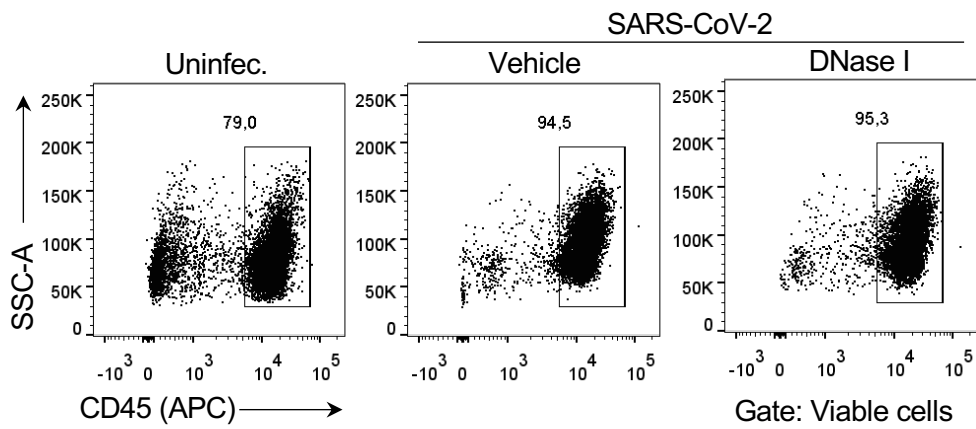

C

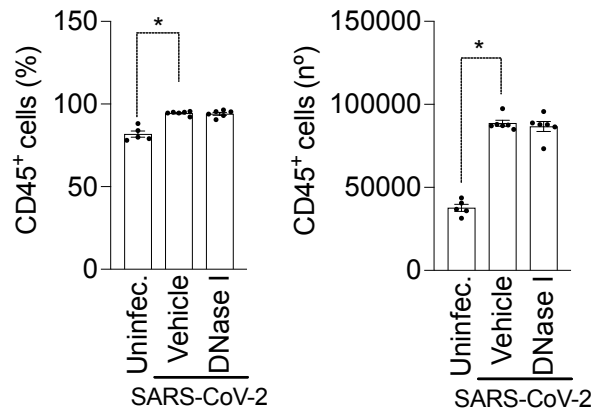

Source: https://www.biorxiv.org/content/10.1101/2022.04.27.489676v1.full.pdf
